# Supplementary material
Source: publisher figshare collection journal article supplement (https://asha.figshare.com/articles/dataset/_/13308470)
Supplement: Supplementary file 1 [file 1]

**Supplemental Material S2.** Sample fidelity checklist for peer behaviors.

| <b>Did the peers...</b>                                                                                                  |                                     |                                    |                                     |
|--------------------------------------------------------------------------------------------------------------------------|-------------------------------------|------------------------------------|-------------------------------------|
| Pause, look expectantly to encourage initiations?                                                                        | <b>Yes</b> <input type="checkbox"/> | <b>No</b> <input type="checkbox"/> | <b>N/A</b> <input type="checkbox"/> |
| Prompt the student to initiate if the student does not initiate spontaneously?                                           | <b>Yes</b> <input type="checkbox"/> | <b>No</b> <input type="checkbox"/> | <b>NA</b> <input type="checkbox"/>  |
| Make leading statements to elicit follow-up questions?                                                                   | <b>Yes</b> <input type="checkbox"/> | <b>No</b> <input type="checkbox"/> | <b>NA</b> <input type="checkbox"/>  |
| Keep the conversation going? Sharing information, asking questions, and taking turns (at least 5 exchanges per episode). | <b>Yes</b> <input type="checkbox"/> | <b>No</b> <input type="checkbox"/> | <b>NA</b> <input type="checkbox"/>  |
| Help their friend respond if there was a communication breakdown?                                                        | <b>Yes</b> <input type="checkbox"/> | <b>No</b> <input type="checkbox"/> | <b>NA</b> <input type="checkbox"/>  |
| Move on/Redirect, as appropriate?                                                                                        | <b>Yes</b> <input type="checkbox"/> | <b>No</b> <input type="checkbox"/> | <b>NA</b> <input type="checkbox"/>  |

*Score Yes if the peer behavior was adequate to produce target outcomes, No if use of the peer behavior was inadequate or incorrect, and NA if the particular peer behavior or strategy was not needed.*

**Feedback to Peers**

|                                                  |  |
|--------------------------------------------------|--|
| Something the peers did well was...              |  |
| Something that the peers could improve on was... |  |

Note: Clinicians should set their own criterion for scoring "yes," "no," or "NA." Peers will miss opportunities, but the question to evaluate is are they using strategies adequately enough to produce target outcomes set for the student.
