# Supplementary material
Source: publisher figshare collection journal article supplement (https://asha.figshare.com/articles/dataset/_/13308470)
Supplement: Supplementary file 2 [file 1]

**Supplemental Material S4.** Self-management checklist from Bambara, Cole, et al. (2020).

Name: \_\_\_\_\_

Date: \_\_\_\_\_

SHOWING INTEREST IN OTHERS

Did I remember to...?

⇒ ASK a question about my friends to START a conversation?

⇒ LISTEN to what my friends say and...

⇒ ASK more about what they said to show interest?  
Ask about their experiences, feelings or thoughts

⇒ SAY something about what they said to show interest?  
Say something positive, encouraging, or show I care about their feelings?

Things I did well:

Things I can do better (Goals for improvement):

Ideas for starting a conversation: What did my friends say today that I could ask about next time?

## Reference

Bambara, L. M., Cole, C. L., Telesford, A., Bauer, K., Bilgili-Karabacak, I., Weir, A., & Thomas, A. (2020). *Using peer supports to encourage adolescents with ASD to show interest in their conversation partners* [Manuscript in preparation]. Department of Education and Human Services, Lehigh University.
