# Supplementary material
Source: publisher figshare collection journal article supplement (https://asha.figshare.com/articles/dataset/_/13308470)
Supplement: Supplementary file 3 [file 1]

**Supplemental Material S3.** Sample worksheet from Bambara, Cole, et al. (2020) to help Focus Student to show interest.

Name: \_\_\_\_\_

Date: \_\_\_\_\_

**Worksheet 1: Questions to Start a Conversation**

**General Questions (you can ask anyone)**

- How's your day going?
- What did you do last weekend?
- What's your favorite movie?

Other general questions you can ask:

- \_\_\_\_\_
- \_\_\_\_\_

**Questions About Your Friends Interests: Ask About Things They Talked About Before:**

- Did you play video games last night?
- How's your driving coming along?
- You were worried about your test. How did it go?

What are some things that your friends talked about? What questions could you ask to start a conversation?

- \_\_\_\_\_
- \_\_\_\_\_

**Questions about your friend's feelings or thoughts**

- Are you feeling better since yesterday?
- What did you think about the assembly this morning?
- Are you happy to be graduating this year?

What questions could you ask to start a conversation?

- \_\_\_\_\_
- \_\_\_\_\_

## Reference

Bambara, L. M., Cole, C. L., Telesford, A., Bauer, K., Bilgili-Karabacak, I., Weir, A., & Thomas, A. (2020). *Using peer supports to encourage adolescents with ASD to show interest in their conversation partners* [Manuscript in preparation]. Department of Education and Human Services, Lehigh University.
